Systems biology

# ST-Steiner: a spatio-temporal gene discovery algorithm

Utku Norman<sup>1</sup> and A. Ercument Cicek <sup>1,2,\*</sup>

<sup>1</sup>Computer Engineering Department, Bilkent University, Ankara 06800, Turkey and <sup>2</sup>Computational Biology Department, School of Computer Science, Carnegie Mellon University, Pittsburgh, PA 15213, USA

\*To whom correspondence should be addressed.

Associate Editor: Bonnie Berger

Received on June 7, 2018; revised on January 16, 2019; editorial decision on February 7, 2019; accepted on February 12, 2019

## Abstract

**Motivation:** Whole exome sequencing (WES) studies for autism spectrum disorder (ASD) could identify only around six dozen risk genes to date because the genetic architecture of the disorder is highly complex. To speed the gene discovery process up, a few network-based ASD gene discovery algorithms were proposed. Although these methods use static gene interaction networks, functional clustering of genes is bound to evolve during neurodevelopment and disruptions are likely to have a cascading effect on the future associations. Thus, approaches that disregard the dynamic nature of neurodevelopment are limited.

**Results:** Here, we present a spatio-temporal gene discovery algorithm, which leverages information from evolving gene co-expression networks of neurodevelopment. The algorithm solves a prize-collecting Steiner forest-based problem on co-expression networks, adapted to model neurodevelopment and transfer information from precursor neurodevelopmental windows. The decisions made by the algorithm can be traced back, adding interpretability to the results. We apply the algorithm on ASD WES data of 3871 samples and identify risk clusters using BrainSpan co-expression networks of early- and mid-fetal periods. On an independent dataset, we show that incorporation of the temporal dimension increases the predictive power: predicted clusters are hit more and show higher enrichment in ASD-related functions compared with the state-of-the-art.

**Availability and implementation:** The code is available at <http://ciceklab.cs.bilkent.edu.tr/st-steiner>.

**Contact:** [cicek@cs.bilkent.edu.tr](mailto:cicek@cs.bilkent.edu.tr)

**Supplementary information:** [Supplementary data](#) are available at *Bioinformatics* online.

## 1 Introduction

Autism spectrum disorder (ASD) is a common neurodevelopmental disorder that affects ~1.5% of the children in the USA (Developmental Disabilities Monitoring Network Surveillance Year 2010 Principal Investigators and Centers for Disease Control and Prevention (CDC), 2014). Recent whole exome sequencing (WES) efforts have paved the way for the identification of dozens of ASD-risk genes (De Rubeis *et al.*, 2014; Iossifov *et al.*, 2012, 2014; Neale *et al.*, 2012; O’Roak *et al.*, 2012; Sanders *et al.*, 2012, 2015). Unfortunately, this number corresponds to only a small portion of the large genetic puzzle, which is expected to contain around a thousand genes (He *et al.*, 2013). Detection of *de novo* loss-of-function (dnLoF) mutations has been the

key for gene discovery due to their high signal-to-noise ratio. However, such mutations are rare and they affect a diverse set of genes. Thus, for most of the genes, the rarity and diversity of variants prevent statistically significant signals from being observed. Therefore, despite analyzing thousands of trios, our yield of discovered genes is still low. The journey toward getting the full picture of the genetic architecture will take a long time and will be financially costly.

Several statistical gene scoring methods have been developed for disease risk prioritization. TADA quantifies the excess variation signal by integrating information from *de novo* and transmitted variation as well as information from case-control studies (He *et al.*, 2013; Sanders *et al.*, 2015). *D*-Score uses gene expression signals

from cell-type specific gene expression in mouse brain to pinpoint dnLoF mutations confer disease risk and improve specificity (Zhang and Shen, 2017). Finally, Krishnan et al. (2016) uses well-established ASD genes and their interaction patterns to train a classifier to predict new susceptibility genes that follow a similar pattern. Such scoring methods have enabled guilt-by-association-based gene discovery techniques to further search for connected components on functional gene interaction networks. These methods assume ASD-risk genes are working as a functional cluster. Starting from already known risk genes, these techniques predict a cluster of closely interacting genes. There are only a few network-based ASD-tailored gene discovery algorithms in the literature: NETBAG (Gilman et al., 2011, 2012), DAWN (Liu et al., 2014, 2015) and MAGI (Hormozdiari et al., 2015). Despite having fundamental differences in their approaches, all of these methods have one point in common: the biological gene interaction networks that they use are static.

NETBAG constructs an integrated network through a comprehensive analysis of many annotation resources (e.g. Gene Ontology (GO), protein domains), and numerous available interaction networks (e.g. Protein Protein Interaction (PPIs), KEGG pathways). On the network, the method assigns each gene pair an interaction score that signifies the likelihood of those genes participating in a genetic phenotype. Then, by following a greedy seed-and-extend procedure, it generates many clusters of genes and returns the cluster with the maximal score that is significant with respect to a permutation test. MAGI uses two PPIs: STRING (Szklarczyk et al., 2010) and HPRD (Keshava Prasad et al., 2008). It also makes use of the co-expression network generated by using full (all brain regions and neurodevelopmental periods) data from the BrainSpan dataset (Sunkin et al., 2012). MAGI follows a seed-and-extend-based approach similar to NETBAG to generate seed pathways that are enriched with dnLoFs in cases, compared with controls. Then, it merges the pathways as long as the cluster score is improved. DAWN estimates partial co-expression networks using BrainSpan, but for only small windows of the neurodevelopment that are indicated as hotspots for ASD (Willsey et al., 2013). Unlike NETBAG and MAGI, which use phenotype-neutral networks, DAWN's approach favors links to already known ASD genes. It predicts ASD genes by assigning a posterior risk score to each gene based on its interactions with other genes, using a hidden Markov random field-based approach. We also would like to mention the method by Krishnan et al. (2016), which uses a data-driven tissue-specific network, where thousands of experiments from the literature are integrated in a Bayesian framework (Greene et al., 2015). Instead of predicting a module like the other described methods, this method uses the known ASD genes and their connectivity patterns as features to train an Support Vector Machine (SVM) classifier, and then assign every gene a probability of being associated with ASD.

Clearly, none of the above-mentioned methods consider the fact that gene interactions (co-expressions) evolve over time. It is demonstrated that different neurodevelopmental spatio-temporal windows have different topologies and consequently, the clustering of ASD susceptibility genes changes drastically (Willsey et al., 2013). Moreover, dysregulation of pathways in earlier periods has cascading effects on the circuitry of the future time periods. For instance, Belinson et al. (2016) show that abnormalities in  $\beta$ -catenin/BRN2/TBR2 transcriptional cascade during embryonic brain development affects production of deep layer projection neurons, which leads to abnormal brain structures and autism-like behavioral abnormalities during adulthood. Hence, we argue that the state-of-the-art methods are limited in predictive power, since static networks they use would fail to capture the dynamic nature of neurodevelopment.

In this article, we propose a novel ASD gene discovery algorithm termed ST-Steiner. The algorithm modifies the prize-collecting

Steiner forest (PCSF) problem and extends it to spatio-temporal networks in order to mimic neurodevelopment. Instead of performing gene discovery on a single network or any number of networks separately, ST-Steiner solves an optimization problem progressively over a cascade of spatio-temporal networks while leveraging information coming from earlier neurodevelopmental periods. The algorithm has three novel aspects: (i) for the first time, the problem is solved on a cascade spatio-temporal co-expression networks so that the dynamic nature of neurodevelopment is taken into account; (ii) the results are more interpretable compared with other methods in the literature, since the decisions made by the algorithm can be traced back on the spatio-temporal cascade; (iii) as the problem is formulated as a PCSF prediction problem, the algorithm predicts only the genes that are essential for the connectivity of known risk genes. Note that this is in contrast to the other approaches which can return redundant paths between known risk genes.

We apply the algorithm on exome sequencing data from De Rubeis et al. (2014) and identify gene clusters using two gene co-expression network cascades of early- and mid-fetal periods. Incorporation of the information from the early-fetal period enables ST-Steiner to predict genes that were not captured by other methods due to the limitation of their static networks. ST-Steiner predicts genes that are related to kinesins (i.e. KIF23 and 4 others) and kinetochore-microtubule attachment processes (NDC80, SGOL2). These two functions work closely for chromosome alignment during mitosis but has very subtle ties to ASD in the literature.

For the first time, we benchmark the performances of the network-based ASD gene discovery algorithms on common training data. We validate the predicted clusters with independent exome sequencing data and find that ST-Steiner's predictions (i) more favorable with respect to a precision-recall scan when compared with the state-of-the-art methods; (ii) overlap more with targets of known ASD-related transcription factors and (iii) enriched more in ASD-related KEGG pathways. We also show in various controlled settings that using temporal information boosts the predictive power, which supports our claim that the clustering of risk genes is spatio-temporal.

## 2 Materials and methods

### 2.1 Overview and background of ST-Steiner

The method we propose to remedy the problems posed by using static networks is built on prize-collecting Steiner tree (PCST) problem. The goal is to find a tree that maximizes the sum of the prizes of the selected nodes while penalizing the total cost of the connecting edges. PCSF problem is a relaxation of PCST such that multiple disconnected components (trees) are allowed. In the biology domain, PCSF has been used to identify multiple independent signaling pathways on a single network (Tuncbag et al., 2013). Later, PCSF is extended to predict a single tree shared among multiple samples (networks with identical topology) with different mutation profiles (different seed genes) (Gitter et al., 2014).

ST-Steiner, selection of similar genes across multiple networks is rewarded in a similar manner to Gitter et al. (2014). However, in contrast, (i) ST-Steiner works with networks of different topologies; (ii) networks are organized in a temporal hierarchy; (iii) reward mechanism is weighted by the prize of a node and only affects networks of future time windows; (iv) networks represent spatio-temporal windows in brain development rather than samples with different mutation profiles; (v) multiple brain regions in the same time window can be simultaneously analyzed without constraining to be similar to each other, where all selected genes in a given time

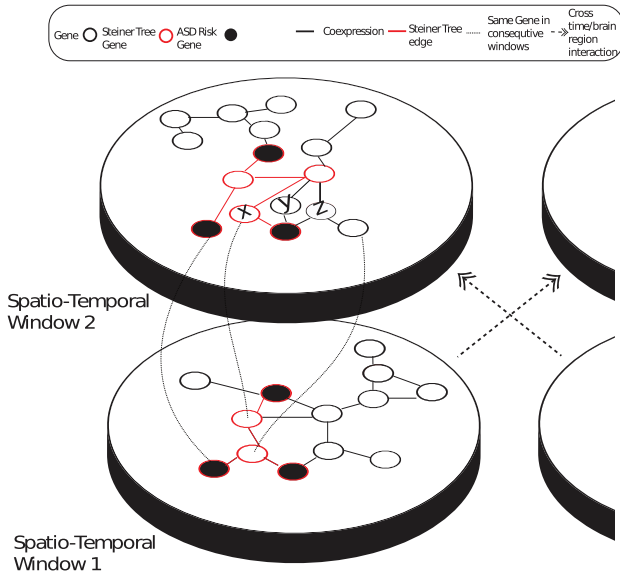

**Fig. 1.** Two spatio-temporal windows (plates) and respective co-expression networks along with a parallel brain region and its plates (partially shown, on the right). Circles represent genes and black edges represent pairs of genes that are co-expressed. Red-bordered nodes form the Steiner tree found on plate 1 (linked with red edges), which minimally connects black seed genes. In ST-Steiner, genes that are selected in Plate 1 are more likely to be selected in Plate 2. Curved lines between windows show the mapping of selected genes from Plate 1 to Plate 2. On the second plate ST-Steiner can pick X, Y or Z to connect the seed genes. Assuming that they all have identical priors and identical edge costs, the algorithm would pick X, because it is selected in the prior window and its prize is increased. If other brain regions in the first temporal window are also considered, then selected genes in those regions would also be used (from the plate on the right)

frame can be assigned an additional prize in the analysis of the next time frame.

A motivating toy example for ST-Steiner and its decision-making process is illustrated in [Figure 1](#). Consider the co-expression network of spatio-temporal window 1. By solving PCSF on this network, the known risk genes (black) are minimally connected by selecting a set of genes (red-bordered). This selection affects which genes will be chosen on the co-expression network of spatio-temporal window 2. Assume genes X, Y and Z are equally likely to be selected (equal prizes and related edge costs) to connect the seed genes. Then, the algorithm prefers gene X, because it is selected in the earlier period and its prize is increased. Next, we formally define PCST, PCSF and then ST-Steiner.

## 2.2 PCST problem

Let  $G(V, E)$  denote an undirected vertex- and edge-weighted graph.  $V$  is the set of nodes,  $E \subseteq V \times V$  is the set of edges that connects node pairs.  $p: V \rightarrow \mathbb{R}_{\geq 0}$  is the node prize function and  $c: E \rightarrow \mathbb{R}_{\geq 0}$  is the edge cost function for  $G$ . Given  $G$ , the task is to find a connected subgraph  $T(V_T, E_T)$  of the graph  $G$ , that minimizes the following objective function:

$$o_T(T) = \sum_{e \in E_T} c(e) + \beta \sum_{v \in V_T} p(v), \quad \beta \geq 0 \quad (1)$$

where  $\beta$  is a sparsity parameter that adjusts the tradeoff between node prizes and edge costs. This tradeoff corresponds to collecting the prize on a node by including the node and evading its edge cost by excluding it. An optimal solution is a tree, since if a cycle exists

in  $T$ , any edge on the cycle can be removed to obtain another tree  $T'$  with  $o_T(T') \leq o_T(T)$ .

## 2.3 PCSF problem

PCSF is an extension of PCST that lifts the connectedness constraint on the desired subgraph: instead of a single tree, the goal is to find a forest. Given  $G$ , the problem is to find a subgraph  $F(V_F, E_F)$  of the graph  $G$  that minimizes the following objective function:

$$o_F(F) = \sum_{e \in E_F} c(e) + \beta \sum_{v \notin V_F} p(v) + \omega \kappa_F, \quad \beta \geq 0, \omega \geq 0 \quad (2)$$

where  $\kappa_F \in \mathbb{N}$  is the number of connected subgraphs (trees) in the subgraph  $F$  and  $\omega$  is a parameter that adjusts its penalty. PCSF is a generalized version of PCST and reduces to PCST when  $\omega = 0$ . An instance of PCSF can be solved as a PCST instance by adding an artificial node  $v_0$  to  $V$  and edges  $E_0 = \{v_0 v_i | v_i \in V\}$  with cost  $\omega$  to  $E$ . Solving PCST on this new graph, and afterwards, removing  $v_0$  and  $E_0$ , yields a minimal solution for the original PCSF instance ([Tuncbag et al., 2012](#)).

## 2.4 Spatio-temporal PCSF problem (ST-Steiner)

In order to model the spatio-temporal dynamics of neurodevelopment, we consider a spatio-temporal system  $G = G_1, G_2, \dots, G_T$ , a list of  $T$  consecutive time windows.

The  $i$ th time window  $G_i = \{G_i^1, G_i^2, \dots, G_i^n\}$  is a set of spatio-temporal networks, with a cardinality of  $n$ . The network  $G_i^j \in G_i$  (with node prize function  $p_i^j$  and edge cost function  $c_i^j$ ), captures the topological state of the system  $G$  for the  $j$ th spatial region in the  $i$ th temporal window. In the context of spatio-temporal gene discovery for ASD, the network  $G_i^j$  represents the co-expression of genes during human brain development at the  $j$ th brain region cluster out of  $n$  regions in total during the  $i$ th time interval  $[t_i, t_i + \tau]$ , where  $\tau \in \mathbb{N}$  is the granularity parameter.

Given a spatio-temporal system  $G$ , the problem is finding a minimum spatio-temporal sub-system  $F = F_1, F_2, \dots, F_T$ .  $F_i = \{F_i^1, F_i^2, \dots, F_i^n\}$  derives from the  $i$ th time window  $G_i$ , and  $F_i^j(V_{F_i^j}, E_{F_i^j})$  is a subgraph of graph  $G_i^j(V_i^j, E_i^j)$ . An optimal sub-system  $F$  minimizes the following objective function:

$$o(F) = \sum_{i=1}^T \sum_{j=1}^n o_F(F_i^j) + \sum_{i=2}^T \sum_{j=1}^n \lambda_i^j \sum_{\substack{v \in V_i^j \\ v \notin V_{F_i^j}}} \phi(\alpha, v, p_i^j, F_{i-1}) \quad (3)$$

where (i)  $o_F(F_i^j)$  refers to the objective function for a single forest  $F_i^j$ , shown in [Equation \(2\)](#), (ii)  $\phi$  is an artificial prize function that promotes the selection of nodes which are selected in forests of the previous time window  $F_{i-1}$ , and finally, (iii)  $\lambda_i^j \geq 0$  is a parameter that adjusts the impact of the artificial prize. The artificial prize function defined in [Equation \(4\)](#) is similar to the definition in ([Gitter et al., 2014](#)), but here, each node gets an artificial prize proportional to its prize.

$$\phi(\alpha, v, p, F_c) = p(v) \left( \sum_{F \in F_c} \frac{I(V_F, v)}{|F_c|} \right)^\alpha, \quad F = (V_F, E_F), \quad \alpha \geq 1, \quad (4)$$

where (i)  $\alpha$  adjusts the non-linearity between the artificial prize for node  $v$  and the fraction of inclusion of node  $v$  among the set of subgraphs  $F_c$ , and (ii)  $I(V_F, v)$  is an indicator function that has value 1 if  $v \in V_F$ , 0 otherwise. Note that, the use of function  $\phi$  corresponds to increasing the prize  $p_i^j(v)$  by an artificial prize, for all time windows  $i > 1$  and each node  $v \in V_i^j$ , such that  $v \in V_{F_{i-1}}^j$  and  $F_{i-1}^j \in F_{i-1}$ .

## 2.5 Datasets and generation of the spatio-temporal networks

In order to model neurodevelopment, we use the BrainSpan microarray dataset of the Allen Brain Atlas (Sunkin *et al.*, 2012) and generate a spatio-temporal system (cascade) of co-expression networks. To partition the dataset into developmental periods and clusters of brain regions, we follow the practice in Willsey *et al.* (2013) as described next.

Brain regions are clustered according to their similarity and four clusters are obtained: (i) V1C (primary visual cortex and superior temporal cortex) (ii) PFC (prefrontal cortex and primary motor-somatosensory cortex), (iii) SHA (striatum, hippocampal anlage/hippocampus and amygdala) and (iv) MDCBC (mediodorsal nucleus of the thalamus and cerebellar cortex). The time windows which are associated with these brain regions: 1–3 which corresponds to early-fetal period, 3–5 and 4–6 which correspond to mid-fetal periods ( $\tau=2$ ). Note that these time windows represent early-neurodevelopment, which is an important stage for ASD. Each graph  $G_i^j$  is a spatio-temporal co-expression network, where  $i$  denotes one of the time intervals and  $j$  denotes one of the four brain region clusters. In this work, a spatio-temporal window of neurodevelopment and its corresponding co-expression network is denoted by the abbreviation for its brain region cluster followed by the time window of interest, e.g. ‘PFC(1–3)’ represents the region PFC at the specific time interval 1–3.

We report our results on the following spatio-temporal cascades: (i) PFC(1–3), as the precursor network for PFC(3–5), (ii) PFC(1–3), as precursor network for PFC(4–6), (iii) all spatial regions in time window 1–3 as precursor networks for PFC(3–5), and (iv) all spatial regions in time window 1–3 as precursor networks for PFC(4–6). The target networks of interest, PFC(3–5) and PFC(4–6), are suggested as hotspots for ASD risk (Willsey *et al.*, 2013). Furthermore, these are also the subject matter of DAWN (Liu *et al.*, 2015), which allows us to directly compare our results to theirs.

An edge between two nodes is created if their absolute Pearson correlation coefficient  $|r|$  is  $\geq 0.7$  in the related portion of BrainSpan data. This threshold has also been used in the literature (Liu *et al.*, 2014, 2015; Willsey *et al.*, 2013). Each edge between a pair of genes is assigned a cost of  $1 - r^2$ . We set node (gene) prizes to the negative natural logarithm of the TADA  $q$ -values. Thus, in all experiments, the prize function is identical for all networks. We obtain TADA  $q$ -values on ASC WES cohort, which is reported on 17 sample sets consisting of 16, 098 DNA samples, 3, 871 ASD cases and also 9, 937 ancestry-matched/parental controls (De Rubeis *et al.*, 2014).

## 3 Results

### 3.1 Comparison with the state-of-the-art methods

We compare the performance of ST-Steiner with three state-of-the-art network-based ASD gene discovery algorithms which predict a module of ASD genes: NETBAG (Gilman *et al.*, 2011, 2012), DAWN (Liu *et al.*, 2014, 2015) and MAGI (Hormozdiari *et al.*, 2015). Input parameters and implementation details for all methods are given in Supplementary Text 1.2.

#### 3.1.1 Input training data

The data from the ASC WES cohort from De Rubeis *et al.* (2014) are inputs to all three methods. ST-Steiner makes use of TADA values. NETBAG utilizes a list of genetic events: we treated each gene with one or more dnLoF as if it was hit by a separate event targeting that gene only. DAWN uses  $z$ -score transformed TADA  $P$ -values,

and ST-Steiner uses TADA  $q$ -values. MAGI, by design, uses *de novo* mutation counts. In addition, MAGI uses a control cohort: we use the control data reported in and made available with their paper (<https://eichlerlab.gs.washington.edu/MAGI/>).

#### 3.1.2 Input networks

ST-Steiner uses the two cascades that are explained in Section 2.5. For the other three methods, the suggested networks in the corresponding papers are used. NETBAG is run with the *likelihood-of-interaction-in-a-phenotype* network it generates, as explained in Gilman *et al.* (2011). DAWN uses the PFC(3–5) and PFC(4–6) partial co-expression networks obtained from BrainSpan, as reported in (Liu *et al.*, 2015). MAGI is run using the STRING (Szklarczyk *et al.*, 2010) and HPRD (Keshava Prasad *et al.*, 2008) PPI networks and the full co-expression network obtained from the BrainSpan dataset (Sunkin *et al.*, 2012).

#### 3.1.3 Validation of the predicted networks

A dnLoF mutation has a very high signal-to-noise ratio, and the genes that are hit are considered to be high risk genes. In this experiment, we validate the predicted gene networks of each method, using the autism-associated dnLoFs obtained from denovo-db [Seattle, WA, USA, [denovo-db.gs.washington.edu](http://denovo-db.gs.washington.edu) (October 2018)] that contains all such mutations published in the literature. We remove all probands used in De Rubeis *et al.* from the validation set to obtain 493 genes with at least one dnLoF mutation (dubbed *validated genes*). Since the two cohorts are completely independent, this is a powerful validation experiment and constitutes a benchmark for all methods. In order to prune possible false positives, we further removed the genes that has a *de novo* LoF mutation in siblings in the Simons Simplex Collection (SSC) cohort, and genes with  $pLI < 0.9$ , to obtain the final set of 200 genes. Note that we are comparing all methods when they are provided with identical training data in terms of dnLoF mutations (of ASC WES cohort): in this sense, this work is the first benchmark of the state-of-the-art network-based ASD gene discovery algorithms when the training data are kept the same.

Since all methods have various parameters that adjust their decisions, we compare the algorithms in a precision–recall curve as shown in Figure 2. For ST-Steiner, the results obtained on networks from 1 to 3 period are kept unchanged and resulting trees on PFC(3–5) and PFC(4–6) are obtained by varying  $\beta$  and  $\lambda$ ; for DAWN, the False Discovery Rate (FDR) threshold is varied to obtain resulting networks of different sizes; for NETBAG, the most significant network produced for each cluster size is plotted; for MAGI, the control/ESP cutoff has been relaxed and variations are plotted.

One would like to see their method balance precision and recall (middle region) and dominate other methods’ points. Results show that ST-Steiner (brown and purple dots) provides a nice balance between the two metrics and mostly dominate a very large portion of the covered range (recall  $\sim[0.025-0.07]$ , precision  $\sim[0.2, 0.33]$ ). DAWN is the closest to ST-Steiner.

ST-Steiner’s success can be attributed to both (i) using the cascaded information coming from a preceding neurodevelopmental window and (ii) ST-Steiner predicting a tree (rather than a forest), which only includes high prize low-cost genes that are essential for connectivity. Also, we explore other ways of utilizing the time dimension in detail in Supplementary Text 1.4 and show that ST-Steiner’s approach is the most effective way.

Aside from the state-of-the-art methods described above, we also compare the same predictions of ST-Steiner with other predicted

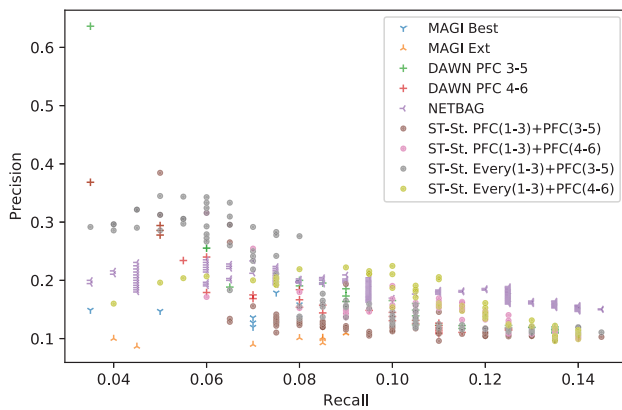

**Fig. 2.** Precision–recall curve for all benchmarked methods when their parameters/thresholds are varied. The ground truth set contains 200 genes which have at least one *de novo* LoF mutation in *denovo-db* after removing (i) the probands included in [De Rubeis et al. \(2014\)](#), (ii) genes with *de novo* LoF mutations in SSC siblings, and (iii) removing genes with  $pLI < 0.9$

ASD-risk gene modules from the literature: NETBAG ([Gilman et al., 2011](#)), AXAS ([Cristino et al., 2014](#)), and co-expression-based modules from [Willsey et al. \(2013\)](#) and [Parikshak et al. \(2013\)](#). As done in [Hormozdiari et al. \(2015\)](#), we take their outputs as is for these comparisons. Results are given in [Supplementary Table S10](#). We note that none of the predicted modules get close to the precision of ST-Steiner.

[Supplementary Text 1.6](#), we also compare ST-Steiner with the state-of-the-art methods on gene sets that are not *ground truth*, but deemed as enriched in ASD-risk genes: SFARI CATI and CATII gene sets, FMRP targets, RBFOX targets, WNT pathway genes, Histone modifier genes and Synaptic genes. Furthermore, a GO term enrichment and Kyoto Encyclopedia of Genes and Genomes (KEGG) pathway enrichment comparison is provided in [Supplementary Text 1.7](#).

### 3.2 Spatio-temporal information promotes selecting validated genes

To see if information coming from a precursor improves the performance, we compare ST-St. PFC(1–3)+(3–5) and ST–St. PFC(1–3) + (4–6) with ST-Steiner results only on PFC(3–5) and PFC(4–6), respectively. For this purpose, we obtain ST-St. PFC(3–5) and ST-St. PFC(4–6) independently, with no time effect ( $\lambda=0$ ,  $\rho=0$ ,  $\beta$  is selected such that  $\varepsilon=0.5$ ). We use the same input data and parameters as described in Section 3.1. The former identifies 20 validated genes by making 211 predictions ( $p=8.272e-12$ ), while ST–St. PFC(1–3) + (3–5) identifies 21 validated genes by choosing 234 genes ( $p=7.0e-12$ ). PFC(4–6) identifies 18 validated genes by predicting 235 genes ( $p=3.018e-9$ ), whereas ST–St. PFC(1–3) + (4–6) identifies 19 validated genes by predicting 256 ( $p=1.836e-9$ ). The increase in the number of validated genes demonstrate that ST-Steiner can leverage temporal information.

Due to  $\rho$ , the network size is increased to include more genes by considering the time dimension (i.e. if  $\rho=0.1$  network is 10% larger compared with using a static network—see [Supplementary Text 1.1](#) for details on selecting parameters). Therefore, the above comparison is slightly unfair. What we want is to see if the leveraged information comes just from network getting bigger or is due to the incorporated spatio-temporal information. To investigate this, we obtain two additional results: ST-St. PFC(3–5)+10% and ST-St. PFC(4–6)+10%. With these results, we are investigating if the algorithm would be as successful by just adding 10% more genes to

PFC(3–5) and to PFC(4–6) without any spatio-temporal analysis. We use the following parameters:  $\lambda=0$ ,  $\beta$  is selected such that they have comparable sizes to PFC(1–3)+(3–5) and PFC(1–3)+(4–6), respectively. ST-St. PFC(3–5)+10% and ST-St. PFC(4–6)+10% contain 230 and 266 genes and identify 20 and 19 validated genes, respectively. These numbers are less significant compared with PFC(1–3)+(3–5) and PFC(1–3)+(4–6) despite having similar sizes. This suggests that the spatio-temporal prize mechanism successfully promotes selecting ASD-related genes.

We also perform a robustness analysis similar to the one in [Liu et al. \(2014\)](#). That is, we remove the genetic signal from 1/30 randomly selected genes and rerun ST-Steiner. This is repeated 30 times for each fold to see how frequently each gene is selected. The visualization of ST-St. PFC(1–3)+(3–5) in comparison to ST–St. PFC(3–5) + 10% is illustrated in [Figure 3](#) along with these robustness values. See [Supplementary Figure S1](#) for a similar comparison of ST–St. PFC(1–3) + (4–6) and PFC(4–6)+10%. We provide a detailed investigation of alternative uses of spatio-temporal information and effect of parameter selection in [Supplementary Text 1.4](#).

### 3.3 Biological insights from ST-Steiner’s predictions

#### 3.3.1 ST-Steiner predicts new ASD-risk genes related to motor activity over microtubules

We investigated the biological meaning of the genes predicted by ST-Steiner. We performed a GO analysis and found strong enrichment for the following top two biological process terms: *mitotic sister chromatid segregation* (adjusted  $P$ -value: 0.0009), *regulation of cytokinesis* (adjusted  $P$ -value: 0.002). These are followed by *positive regulation of excitatory postsynaptic potential* (adjusted  $P$ -value: 0.002), Notch signaling pathway (adjusted  $P$ -value: 0.002). Notch signaling pathway and excitatory postsynaptic potential (hence, synaptic transmission) are well known disrupted circuitries in ASD etiology ([Cau and Blader, 2009](#); [De Rubeis et al., 2014](#)). However, cytokinesis and chromatid segregation are less pronounced in the ASD literature. The genes associated with these two GO terms are BIRC6, CUL3, DLGAP5, KIF18A, KIF20A, KIF23, KLHL9, NCAPG, NDC80, NUSAP1, POGZ, PRC1, PRPF40A and SPAST. Among these 14 genes, only 5 (BIRC6, CUL3, POGZ, PRPF40A and SPAST) have *de novo* LoF mutations in [De Rubeis et al. \(2014\)](#), which shows relatively low prior association. Despite not annotated, ST-Steiner detects 2 other KIF genes: KIF1A and KIF11. Note that TADA  $q$ -values are available only for 6 KIF genes and ST-Steiner selects 5 of them. Investigating the top GO molecular function terms also shows that *motor activity* and *microtubule motor activity* are ranked first and third (adjusted  $P$ -values: 0.002 and 0.03, respectively). These terms capture all five KIF genes predicted by ST-Steiner. In addition, an enrichment test on MSigDB pathways shows that the Reactome Kinesin pathway has the most significant overlap with the genes detected by ST-Steiner (5/24,  $P$ -value =  $3.9e-5$ ). Kinesins are known to transport cargo to dendritic spines undergoing synaptic plasticity over microtubules ([McVicker et al., 2016](#)). They also play a role in organization of spindle microtubules during mitosis ([Ems-McClung and Walczak, 2010](#)). In summary, the algorithm returns a coherently co-expressed functional cluster of genes related to kinesins and their activity on microtubules during cell division and it predicts that the disruption of this circuitry is potentially related to ASD risk.

#### 3.3.2 ST-Steiner predicts new genes with temporal information

Next, we investigate the genes whose prediction is enabled by the use of temporal information. That is, we evaluate only genes that

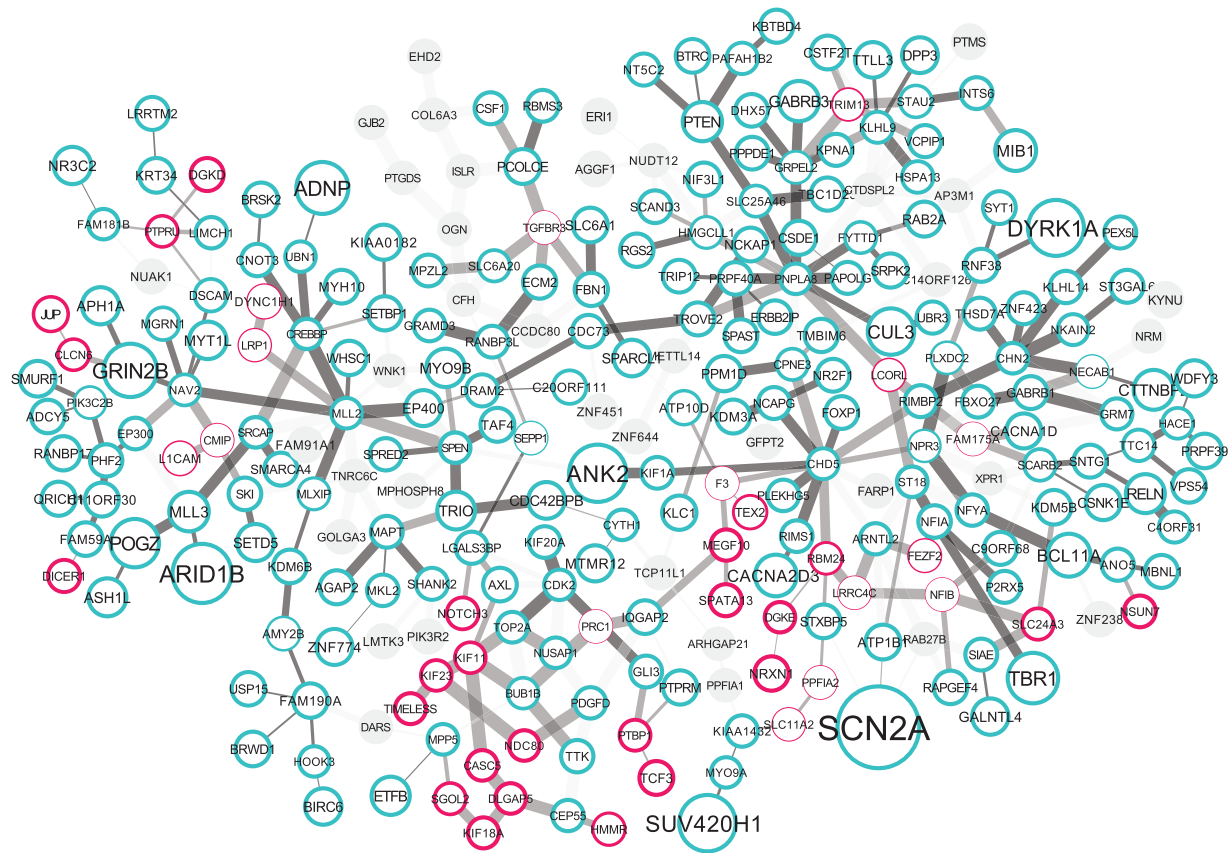

**Fig. 3.** Image visualizes ST-St. PFC(1–3)+(3–5) network which is laid over ST-St. PFC(3–5)+10%. Turquoise bordered genes are common in ST – St. PFC(1–3) + (3–5) and ST – St. PFC(3–5) + 10%. Pink bordered genes are only in ST-St. PFC(1–3)+(3–5), highlighting the effect of using the temporal dimension and information coming from PFC(1–3). Gray genes are present only in PFC(3–5)+10% and are not included by ST-St. PFC(1–3)+(3–5). Size of a node indicates its significance w.r.t. its TADA  $q$ -value in De Rubeis *et al.* (2014) (the larger, the more significant). The thickness of the border of a node indicates its robustness. The thickness of an edges represents the correlation coefficient between the gene pair (the thicker, the higher). Visualized using the CoSE layout (Dogrusoz *et al.*, 2009) in Cytoscape (Shannon *et al.*, 2003)

are included both in ST – St. PFC(1–3) + (3–5) and ST-St. PFC(1–3)+(4–6), but excluded from PFC(3–5) + 10% or PFC(4–6)+10%. Here, focus on novel predictions, only. There are nine such genes and we focus on the six that are detected neither by DAWN nor by MAGI. Furthermore, these genes are not pointed out in WES studies: they all have low scores in TADA, and ranked at most as Category 4 in SFARI gene which stands for ‘minimal evidence’, if included at all. Among these six genes, we did not find any evidence of association with ASD for the following ones: KIF23, NDC80 and SGOL2. Interestingly, NDC80 and SGOL2 also take part in kinetochore-microtubule attachment during cell division. These two genes and five KIF genes closely interact in Figure 3 and form a module of their own. We checked if a similar module exists on an orthogonal source of interaction information such as PPI. Using InWeb-InBiomap tool (Li *et al.*, 2017), we found a striking motif in the PPI network of the predicted genes by ST-Steiner. The only clique with more than three genes was formed by BUB1B, CASC5, KIF18A, NDC80 and SGOL2. BUB1B is localized to the kinetochore and performs spindle checkpoint function. CASC5 links BUB1B to kinetochore and performs spindle assembly checkpoint signaling for chromosome alignment during cell division. These results further support our findings in Section 3.3.1.

Among the above-mentioned six genes, the following genes have subtle clues in the literature. MEGF10 is also related to cell proliferation and adhesion, and recently variants in its regulatory region

have tied it to ASD (Wu *et al.*, 2017). The fifth gene is CMIP, which is a signaling protein previously associated with language delay and whose truncation is found to be related to cytoskeleton reorganization (Grimbert *et al.*, 2003). There are two studies (one very recent) indicating haploinsufficiency of CMIP leads to ASD (Luo *et al.*, 2017; Van der Aa *et al.*, 2012). Selection of CMIP in ST-St. PFC(1–3) + (3–5) enables inclusion of another gene L1CAM with a link to CMIP, which is related to neurite outgrowth and cell migration. The final gene, which is time induced (ironically), is TIMELESS. It is related to circadian rhythm, and it is also linked to ASD before in a study (Yang *et al.*, 2016).

### 3.3.3 Synaptic and chromatin genes form distinct modules

Here, we analyze how genes representing some well-known and predicted biological processes are laid out on the subnetwork shown in Section 3. Supplementary Figure S6 shows how synaptic genes (green), chromatin modeling genes (blue) and cytoskeleton-related genes (pink) are organized within the topology of the predicted Steiner tree. The list of synaptic genes is obtained from Genes to Cognition (<http://www.genes2cognition.org/>). We use lists L09–L16, which include the human orthologues of various synaptic complexes in mouse. The list of chromatin modifiers is obtained from Khare *et al.* (2012) and Huang *et al.* (2013). List of cytoskeleton-related genes is obtained by a manual search on GeneCards (Stelzer *et al.*, 2016).

Despite being two of the major affected circuitries in ASD etiology, it was reported in literature that synaptic and chromatin genes are not interacting and form separate groups on protein interaction networks (De Rubeis *et al.*, 2014; Sanders *et al.*, 2015). We confirm this finding in our results which is based on a gene co-expression network. We observe six interactions between these two groups, which is much lower than expected (expected: 8.93,  $P$ -value: 0.777, 1000 random draws for two distinct gene sets of respective sizes on this subnetwork). On the contrary, synaptic genes and chromatin genes are tightly interacting within their modules (number of connections: 12 and 10; expected: 4.24 and 4.45;  $P$ -values: 0.004 and  $<0.001$ , respectively). This result may indicate two functionalities. We observe that cytoskeleton genes are almost uniformly distributed interacting and even overlapping with synaptic and chromatin genes.

### 3.3.4 ST-Steiner provides interpretable predictions

Here, we focus on genes that are relatively more established in literature compared with the genes in the previous subsection. However, them not being selected by ST-Steiner without the time information allows us to traceback the information and show that ST-Steiner is able to also return more interpretable results.

The first two genes are NOTCH2 and NOTCH3, membrane receptors of NOTCH signaling pathway. The former gene is selected in both ST – St. PFC(1–3) + (3–5) and ST – St. PFC(1–3) + (4–6), the latter is selected in ST – St. PFC(1–3) + (4–6). This pathway is important for neuron differentiation (Cau and Blader, 2009). More importantly, it is active during embryogenesis (time-point 1) (Wolter, 2013). Thus, its disruption is expected to have a cascaded effect during time window 3–5. Another gene that is retained is TCF3, which has been highlighted in De Rubeis *et al.* (2014) as one of the few hub transcription factors to regulate many ASD-risk genes along with many histone modifiers. Similar to NOTCH signaling pathway, which regulates neuron differentiation, TCF3 is found to promote differentiation in embryonic stem cells (Merrill *et al.*, 2001; Nguyen *et al.*, 2006). More importantly, it represses neuron differentiation in neural precursor cells (Kuwahara *et al.*, 2014; Ohtsuka *et al.*, 2011), which again corresponds to the time window 1–3. Thus, in line with our hypothesis that clustering of genes is spatio-temporal, ST-Steiner predicts these genes by considering the effect of the earlier time window. This also means that one can trace back the information source which enables the selection of these genes. This adds further interpretability to our results.

### 3.4 ST-Steiner is not specific to ASD: epilepsy analysis

ST-Steiner can work with any disorder with a progression model and corresponding cascade of ‘gene-interaction’ networks. One such disorder is epilepsy, which was shown to might have its genetic roots during embryogenesis (Vadlamudi *et al.*, 2010) and could be progressive (Pitkänen and Sutula, 2002). It is also known to be comorbid to ASD (Jeste and Tuchman, 2015). We analyze the epilepsy WES data of 356 trios and corresponding extTADA (an extension of the TADA method) results provided in Nguyen *et al.* (2017). We use the PFC(1–3) + (3–5) cascade as frontal lobe epilepsy is one of the most prominent types and the disorder and prenatal period is known to be a factor in the future phenotype (Scher, 2003). This cascade also enables us to compare the results of ASD and epilepsy analyses. Details about the analysis are given in Supplementary Text 1.8 and the resulting network is shown in Supplementary Figure S7. As expected ST-Steiner picks up a very different subnetwork compared the ASD results despite using the same underlying network. We find

that the predicted cluster is mostly enriched in genes related to GABA receptor activity, which has a well-established tie to epilepsy (Treiman, 2001). The next enriched term is ‘myosin V binding’ and the related genes RAB27B and RAB6B have very low TADA priors ( $q=0.98$ ). There are not many associations of myosins to epilepsy in the literature. One rare example is Mercer *et al.* (1991) in which a mutation in MYO5A causes epileptic phenotype in a mouse model (Pitkänen *et al.*, 2017). Note that MYO5A is also detected by ST-Steiner despite its low prior ( $q=0.55$ ). Despite the direct link between myosins and epilepsy is blurred, myosin Vb was shown to mediate glutamate receptor subunits in developing neurons (Lisè *et al.*, 2006). As glutamatergic signaling is a key pathway that is denoted as a potential therapeutic target for epilepsy (Barker-Haliski and White, 2015), myosins could as well have a role in this disorder, as suggested by ST-Steiner.

## 4 Discussion and conclusion

ASD is a common neurodevelopmental disorder which is a life-long challenge for many families all around the world. Gaining an understanding of the cause of ASD and opening a way to the development of new treatments would certainly have a major impact on the lives of many. Even though we have long ways to go to understand the etiology of the disorder, network-based gene discovery algorithms have proven useful for gene discovery. In this work, we propose a novel ASD gene discovery algorithm that for the first time models the cascading effect of disrupted functional circuits in neurodevelopment.

We show that ST-Steiner achieves a good balance between precision and recall. While other methods output a graph of genes, ST-Steiner outputs a tree/forest. That is, no multiple paths exist between any pair of genes and some genes can be left out if they are not essential for connectivity due to having low prior risk or high-cost edges. Precision is also achieved via rewarding selected genes from earlier periods, which makes the algorithm more confident on the predictions it makes. We show that once the temporal information is employed, predictive power increases, which supports our hypothesis that the clustering of genes is spatio-temporal rather than static.

We also think there is still room for improvement in ST-Steiner’s formulation. Considering that PPI networks give MAGI an orthogonal source of information, one future extension direction would be the incorporation of information from this source. Note that the goal of this paper is to show that the clustering of ASD genes are dynamic rather than static. This is the reason why we do not consider PPIs, but restrict the problem definition and our tests to observe the cascaded effects of dysregulation in earlier time windows.

## Acknowledgements

We thank Fereydoun Hormozdiari and Li Liu for help with their methods; Ozgur Tastan and Serhan Yilmaz for their feedback on the design of ST-Steiner, Kerem Ayoç and Oguzhan Karakahya with the help on testing the program and Lambertus Klei for the help on processing BrainSpan data.

## Funding

This work was supported by a grant from the Simons Foundation (SFARI 416835, AEC).

*Conflict of Interest:* none declared.

## References

- Barker-Haliski, M. and White, H.S. (2015) Glutamatergic mechanisms associated with seizures and epilepsy. *Cold Spring Harb. Perspect. Med.*, **5**, a022863.
- Belinson, H. *et al.* (2016) Prenatal  $\beta$ -catenin/brn2/tbr2 transcriptional cascade regulates adult social and stereotypic behaviors. *Mol. Psychiatry*, **21**, 1417.
- Cau, E. and Blader, P. (2009) Notch activity in the nervous system: to switch or not switch? *Neural Dev.*, **4**, 36.
- Cristino, A. *et al.* (2014) Neurodevelopmental and neuropsychiatric disorders represent an interconnected molecular system. *Mol. Psychiatry*, **19**, 294–301.
- De Rubeis, S. *et al.* (2014) Synaptic, transcriptional and chromatin genes disrupted in autism. *Nature*, **515**, 209–215.
- Developmental Disabilities Monitoring Network Surveillance Year 2010 Principal Investigators; Centers for Disease Control and Prevention (CDC). (2014) Prevalence of autism spectrum disorder among children aged 8 years—autism and developmental disabilities monitoring network, 11 sites, United States, 2010. *MMWR Surveill. Summ.*, **63**, 1–21.
- Dogrusoz, U. *et al.* (2009) A layout algorithm for undirected compound graphs. *Inf. Sci.*, **179**, 980–994.
- Ems-McClung, S.C. and Walczak, C.E. (2010) Kinesin-13s in mitosis: key players in the spatial and temporal organization of spindle microtubules. *Sem. Cell Dev. Biol.*, **21**, 276–282.
- Gilman, S.R. *et al.* (2011) Rare de novo variants associated with autism implicate a large functional network of genes involved in formation and function of synapses. *Neuron*, **70**, 898–907.
- Gilman, S.R. *et al.* (2012) Diverse types of genetic variation converge on functional gene networks involved in schizophrenia. *Nat. Neurosci.*, **15**, 1723–1728.
- Gitter, A. *et al.* (2014) Sharing information to reconstruct patient-specific pathways in heterogeneous diseases. In: Altman, R.B. *et al.* (eds) *Biocomputing 2014: Proceedings of the Pacific Symposium*, Kohala Coast, Hawaii, USA, January 3–7, 2014, pp. 39–50.
- Greene, C.S. *et al.* (2015) Understanding multicellular function and disease with human tissue-specific networks. *Nat. Genet.*, **47**, 569.
- Grimbert, P. *et al.* (2003) Truncation of c-mip (tc-mip), a new proximal signaling protein, induces c-maf th2 transcription factor and cytoskeleton reorganization. *J. Exp. Med.*, **198**, 797–807.
- He, X. *et al.* (2013) Integrated model of de novo and inherited genetic variants yields greater power to identify risk genes. *PLoS Genet.*, **9**, e1003671.
- Hormozdiari, F. *et al.* (2015) The discovery of integrated gene networks for autism and related disorders. *Genome Res.*, **25**, 142–154.
- Huang, H.-T. *et al.* (2013) A network of epigenetic regulators guides developmental haematopoiesis in vivo. *Nat. Cell Biol.*, **15**, 1516.
- Iossifov, I. *et al.* (2012) De novo gene disruptions in children on the autistic spectrum. *Neuron*, **74**, 285–299.
- Iossifov, I. *et al.* (2014) The contribution of de novo coding mutations to autism spectrum disorder. *Nature*, **515**, 216–221.
- Jeste, S.S. and Tuchman, R. (2015) Autism spectrum disorder and epilepsy: two sides of the same coin? *J. Child Neurol.*, **30**, 1963–1971.
- Keshava Prasad, T. *et al.* (2008) Human protein reference database-2009 update. *Nucleic Acids Res.*, **37**(Suppl. 1), D767–D772.
- Khare, S.P. *et al.* (2012) Histome—a relational knowledgebase of human histone proteins and histone modifying enzymes. *Nucleic Acids Res.*, **40**, D337–D342.
- Krishnan, A. *et al.* (2016) Genome-wide prediction and functional characterization of the genetic basis of autism spectrum disorder. *Nat. Neurosci.*, **19**, 1454–1462.
- Kuwahara, A. *et al.* (2014) Tcf3 represses wnt- $\beta$ -catenin signaling and maintains neural stem cell population during neocortical development. *PLoS One*, **9**, e94408.
- Li, T. *et al.* (2017) A scored human protein–protein interaction network to catalyze genomic interpretation. *Nat. Methods*, **14**, 61.
- Lisé, M.-F. *et al.* (2006) Involvement of myosin vb in glutamate receptor trafficking. *J. Biol. Chem.*, **281**, 3669–3678.
- Liu, L. *et al.* (2014) Dawn: a framework to identify autism genes and subnetworks using gene expression and genetics. *Mol. Autism*, **5**, 22.
- Liu, L. *et al.* (2015) Network assisted analysis to reveal the genetic basis of autism. *Ann. Appl. Stat.*, **9**, 1571.
- Luo, M. *et al.* (2017) cmip haploinsufficiency in two patients with autism spectrum disorder and co-occurring gastrointestinal issues. *Am. J. Med. Genet. A*, **173**, 2101–2107.
- McVicker, D.P. *et al.* (2016) Transport of a Kinesin-Cargo pair along microtubules into dendritic spines undergoing synaptic plasticity. *Nat. Commun.*, **7**, 12741.
- Mercer, J.A. *et al.* (1991) Novel myosin heavy chain encoded by murine dilute coat colour locus. *Nature*, **349**, 709.
- Merrill, B.J. *et al.* (2001) Tcf3 and lef1 regulate lineage differentiation of multipotent stem cells in skin. *Genes Dev.*, **15**, 1688–1705.
- Neale, B.M. *et al.* (2012) Patterns and rates of exonic de novo mutations in autism spectrum disorders. *Nature*, **485**, 242.
- Nguyen, H. *et al.* (2006) Tcf3 governs stem cell features and represses cell fate determination in skin. *Cell*, **127**, 171–183.
- Nguyen, H.T. *et al.* (2017) Integrated Bayesian analysis of rare exonic variants to identify risk genes for schizophrenia and neurodevelopmental disorders. *Genome Med.*, **9**, 114.
- Ohtsuka, T. *et al.* (2011) Gene expression profiling of neural stem cells and identification of regulators of neural differentiation during cortical development. *Stem Cells*, **29**, 1817–1828.
- O’Roak, B.J. *et al.* (2012) Sporadic autism exomes reveal a highly interconnected protein network of de novo mutations. *Nature*, **485**, 246.
- Parikhshak, N.N. *et al.* (2013) Integrative functional genomic analyses implicate specific molecular pathways and circuits in autism. *Cell*, **155**, 1008–1021.
- Pitkänen, A. and Sutula, T.P. (2002) Is epilepsy a progressive disorder? Prospects for new therapeutic approaches in temporal-lobe epilepsy. *Lancet Neurol.*, **1**, 173–181.
- Pitkänen, A. *et al.* (2017) *Models of Seizures and Epilepsy*. Academic Press, Cambridge, Massachusetts.
- Sanders, S.J. *et al.* (2012) De novo mutations revealed by whole-exome sequencing are strongly associated with autism. *Nature*, **485**, 237.
- Sanders, S.J. *et al.* (2015) Insights into autism spectrum disorder genomic architecture and biology from 71 risk loci. *Neuron*, **87**, 1215–1233.
- Scher, M.S. (2003) Prenatal contributions to epilepsy: lessons from the bedside. *Epileptic Dis.*, **5**, 77–91.
- Shannon, P. *et al.* (2003) Cytoscape: a software environment for integrated models of biomolecular interaction networks. *Genome Res.*, **13**, 2498–2504.
- Stelzer, G. *et al.* (2016) The GeneCards suite: from gene data mining to disease genome sequence analyses. *Curr. Protoc. Bioinformatics*, **54**, 1–30.
- Sunkin, S.M. *et al.* (2012) Allen brain atlas: an integrated spatio-temporal portal for exploring the central nervous system. *Nucleic Acids Res.*, **41**, D996–D1008.
- Szklarczyk, D. *et al.* (2010) The string database in 2011: functional interaction networks of proteins, globally integrated and scored. *Nucleic Acids Res.*, **39**(Suppl. 1), D561–D568.
- Treiman, D.M. (2001) Gabaergic mechanisms in epilepsy. *Epilepsia*, **42**, 8–12.
- Tuncbag, N. *et al.* (2012) Simultaneous reconstruction of multiple signaling pathways via the prize-collecting Steiner forest problem. In: *Lecture Notes in Computer Science Research in Computational Molecular Biology*, pp. 287–301.
- Tuncbag, N. *et al.* (2013) Simultaneous reconstruction of multiple signaling pathways via the prize-collecting Steiner forest problem. *J. Comput. Biol.*, **20**, 124–136.
- Vadlamudi, L. *et al.* (2010) Timing of de novo mutagenesis—a twin study of sodium-channel mutations. *N. Engl. J. Med.*, **363**, 1335–1340.
- Van der Aa, N. *et al.* (2012) Haploinsufficiency of cmip in a girl with autism spectrum disorder and developmental delay due to a de novo deletion on chromosome 16q23.2. *Autism Res.*, **5**, 277–281.
- Willsey, A.J. *et al.* (2013) Coexpression networks implicate human midfetal deep cortical projection neurons in the pathogenesis of autism. *Cell*, **155**, 997–1007.
- Wolter, J. (2013) The notch signaling pathway in embryogenesis. Embryo Project Encyclopedia. <https://hpsrepository.asu.edu/handle/10776/4211>.
- Wu, Z. *et al.* (2017) Genetic variants in the transcription regulatory region of megf10 are associated with autism in Chinese Han population. *Sci. Rep.*, **7**, 2292.
- Yang, Z. *et al.* (2016) Circadian-relevant genes are highly polymorphic in autism spectrum disorder patients. *Brain Dev.*, **38**, 91–99.
- Zhang, C., and Shen, Y. (2017) A cell type-specific expression signature predicts haploinsufficient autism-susceptibility genes. *Hum. Mutat.*, **38**, 204–215.
